# Supplementary material
Source: Royal Society of Chemistry journal article supplement (doi:10.1039/d6cp00525j)

## **Unraveling the Effects of Surface Functional Groups and Assembly Orientations on the Interfacial Mechanics of MXene/Silk Composites**

**Changji Yin<sup>1,2,3</sup>, Chunbao Du<sup>2</sup>, Jiahao Qin<sup>3,4</sup>, Songwen Tan<sup>4</sup>, Gang Zhang<sup>1,2</sup>,**

**Jing He<sup>5</sup>, Yuan Cheng<sup>3,4\*</sup>**

1. School of Materials Science and Engineering, Beijing Institute of Technology, Beijing 100081, China.
2. Yangtze Delta Region Academy in Jiaxing, Beijing Institute of Technology, Jiaxing 314019, China.
3. Department of Materials Science and Engineering, Monash University, Clayton, Victoria 3800, Australia.
4. Monash Suzhou Research Institute, Monash University, SIP, Suzhou 215000, China.
5. Faculty of Medicine, University of Queensland, St Lucia, QLD 4072, Australia.

\*Corresponding Author: Yuan Cheng (yuan.cheng@monash.edu)

**Figure S1a.** Atomic structures of the  $Ti_3C_2T_x$  MXene models used in this work, including  $Ti_3C_2$ ,  $Ti_3C_2O_2$ , and  $Ti_3C_2(OH)_2$ .

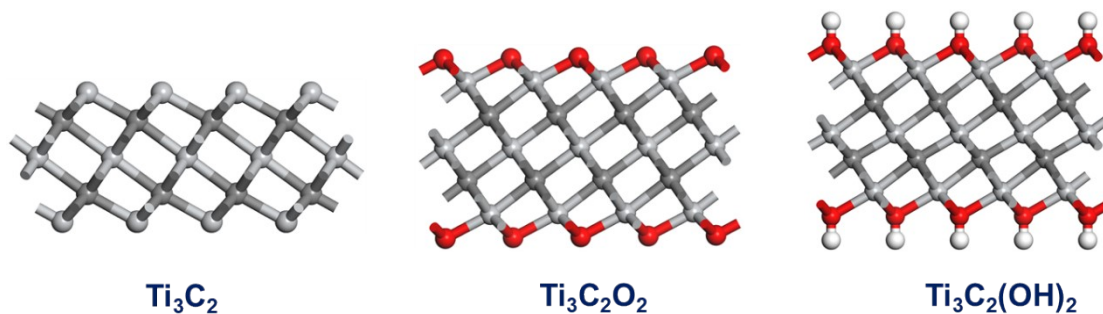

**Figure S1b.** Three-dimensional representations of the silk fibroin (SF) molecular structure from different viewing orientations.

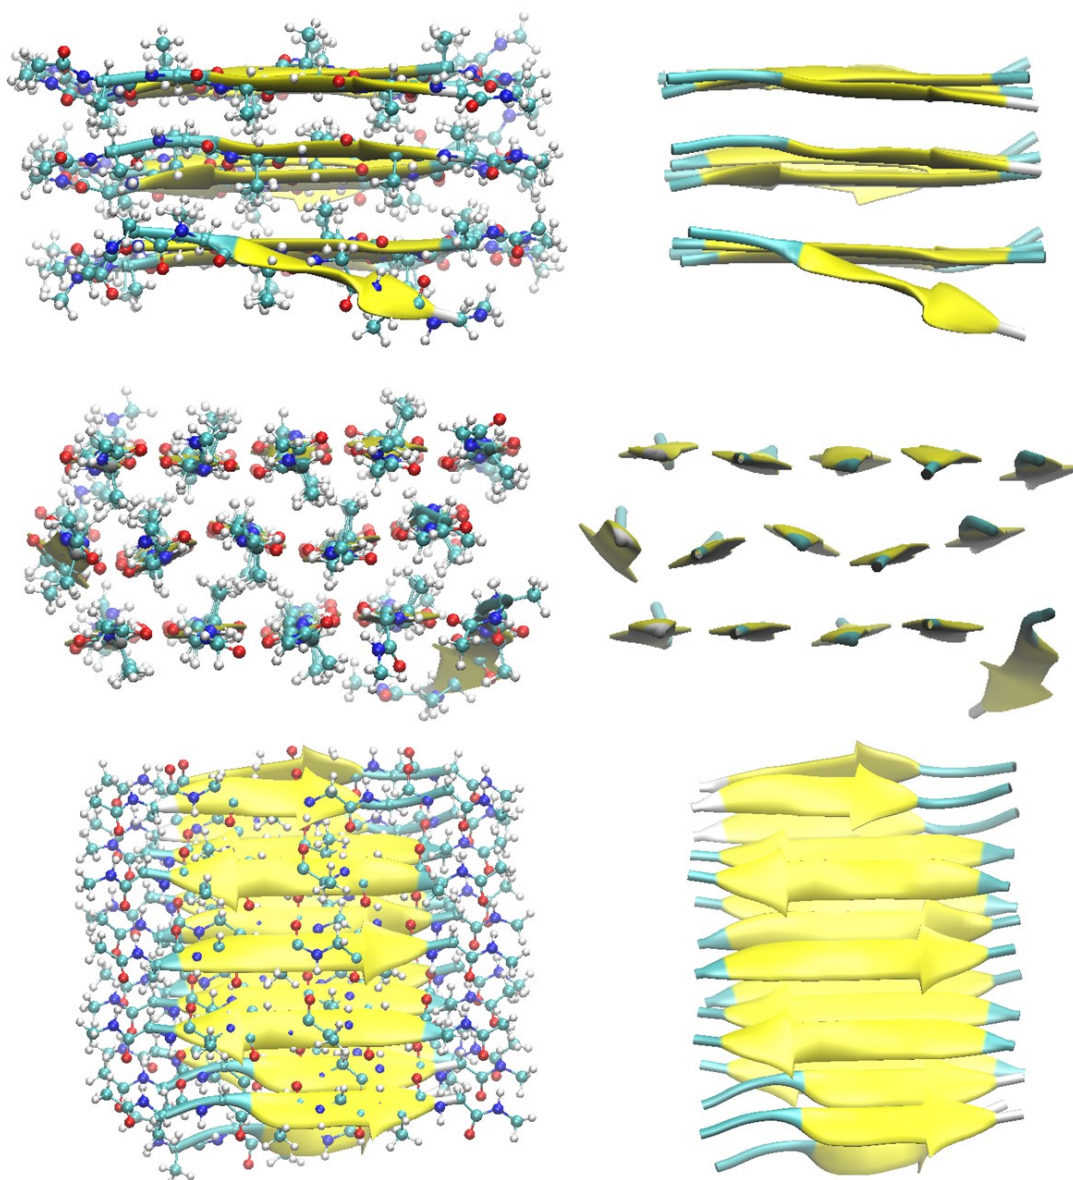

**Figure S2a.** Layered architecture of MXene ( $\text{Ti}_3\text{C}_2$ )/SF composites with varied chain orientations. The illustrations depict the MXene nanosheets interleaved with SF chains oriented at a)  $0^\circ$  (parallel), b)  $45^\circ$  (diagonal), c)  $90^\circ$  (perpendicular), relative to the MXene surface.

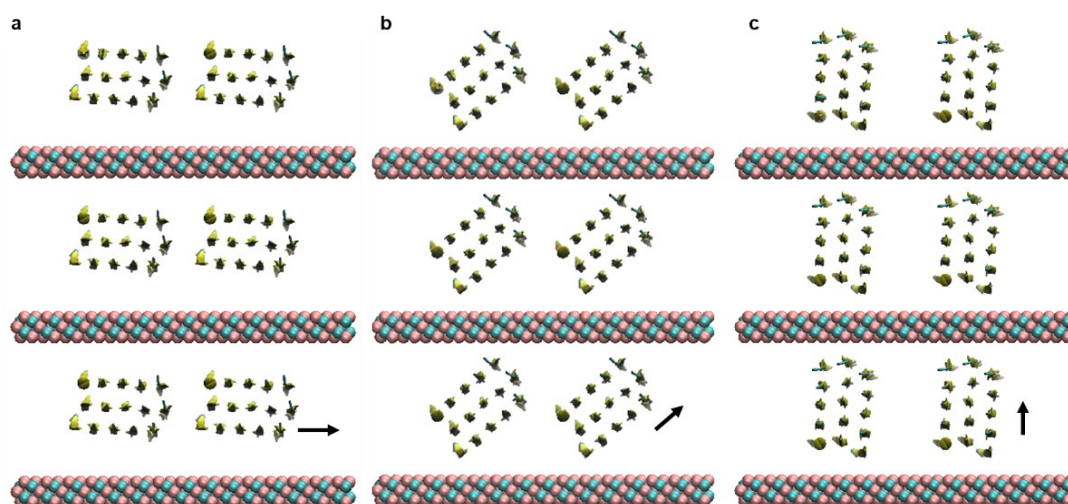

**Figure S2b.** Layered architecture of MXene ( $\text{Ti}_3\text{C}_2\text{O}_2$ )/SF composites with varied chain orientations. The illustrations depict the MXene nanosheets interleaved with SF chains oriented at a)  $0^\circ$ , b)  $45^\circ$ , c)  $90^\circ$  relative to the MXene surface.

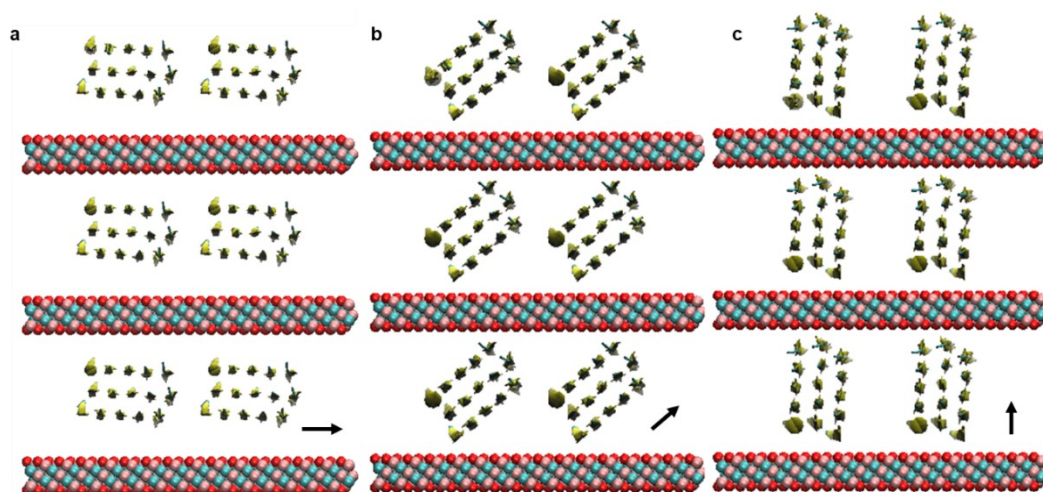

**Figure S2c.** Layered architecture of MXene ( $\text{Ti}_3\text{C}_2(\text{OH})_2$ )/SF composites with varied chain orientations. The illustrations depict the MXene nanosheets interleaved with SF chains oriented at a)  $0^\circ$ , b)  $45^\circ$ , c)  $90^\circ$  relative to the MXene surface.

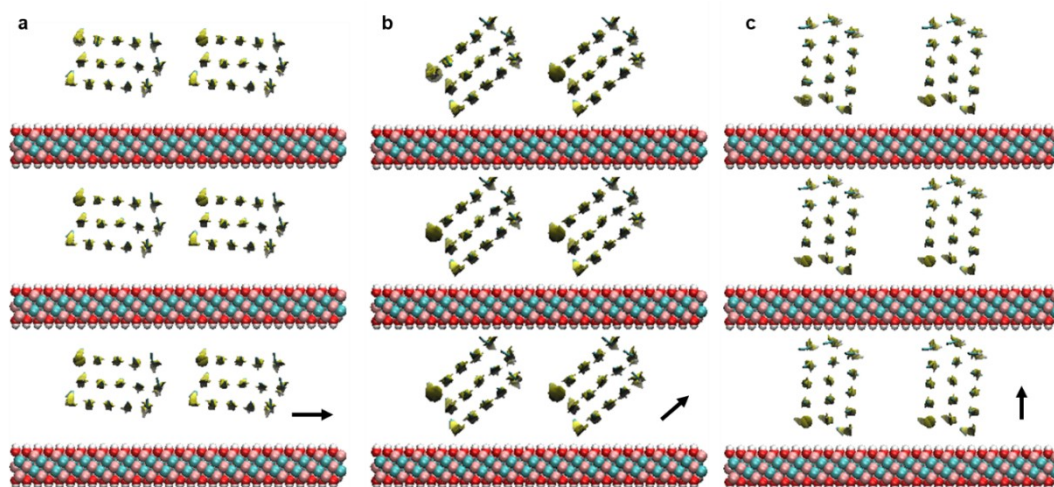

**Table S1.** The water molecular number in different systems.

| <b>Types</b>                                               | <b>Water molecules number</b> |
|------------------------------------------------------------|-------------------------------|
| 0°_Ti <sub>3</sub> C <sub>2</sub> /Silk                    | 68257                         |
| 0°_Ti <sub>3</sub> C <sub>2</sub> O <sub>2</sub> /Silk     | 67310                         |
| 0°_Ti <sub>3</sub> C <sub>2</sub> (OH) <sub>2</sub> /Silk  | 66496                         |
| 45°_Ti <sub>3</sub> C <sub>2</sub> /Silk                   | 82165                         |
| 45°_Ti <sub>3</sub> C <sub>2</sub> O <sub>2</sub> /Silk    | 80826                         |
| 45°_Ti <sub>3</sub> C <sub>2</sub> (OH) <sub>2</sub> /Silk | 81228                         |
| 90°_Ti <sub>3</sub> C <sub>2</sub> /Silk                   | 82221                         |
| 90°_Ti <sub>3</sub> C <sub>2</sub> O <sub>2</sub> /Silk    | 81965                         |
| 90°_Ti <sub>3</sub> C <sub>2</sub> (OH) <sub>2</sub> /Silk | 81550                         |

**Figure S3.** Structural integrity of silk fibroin (SF) during shear deformation. DSSP analysis of the secondary structure composition for SF layers in different MXene/SF composites across  $0^\circ$ ,  $45^\circ$  and  $90^\circ$  orientations.

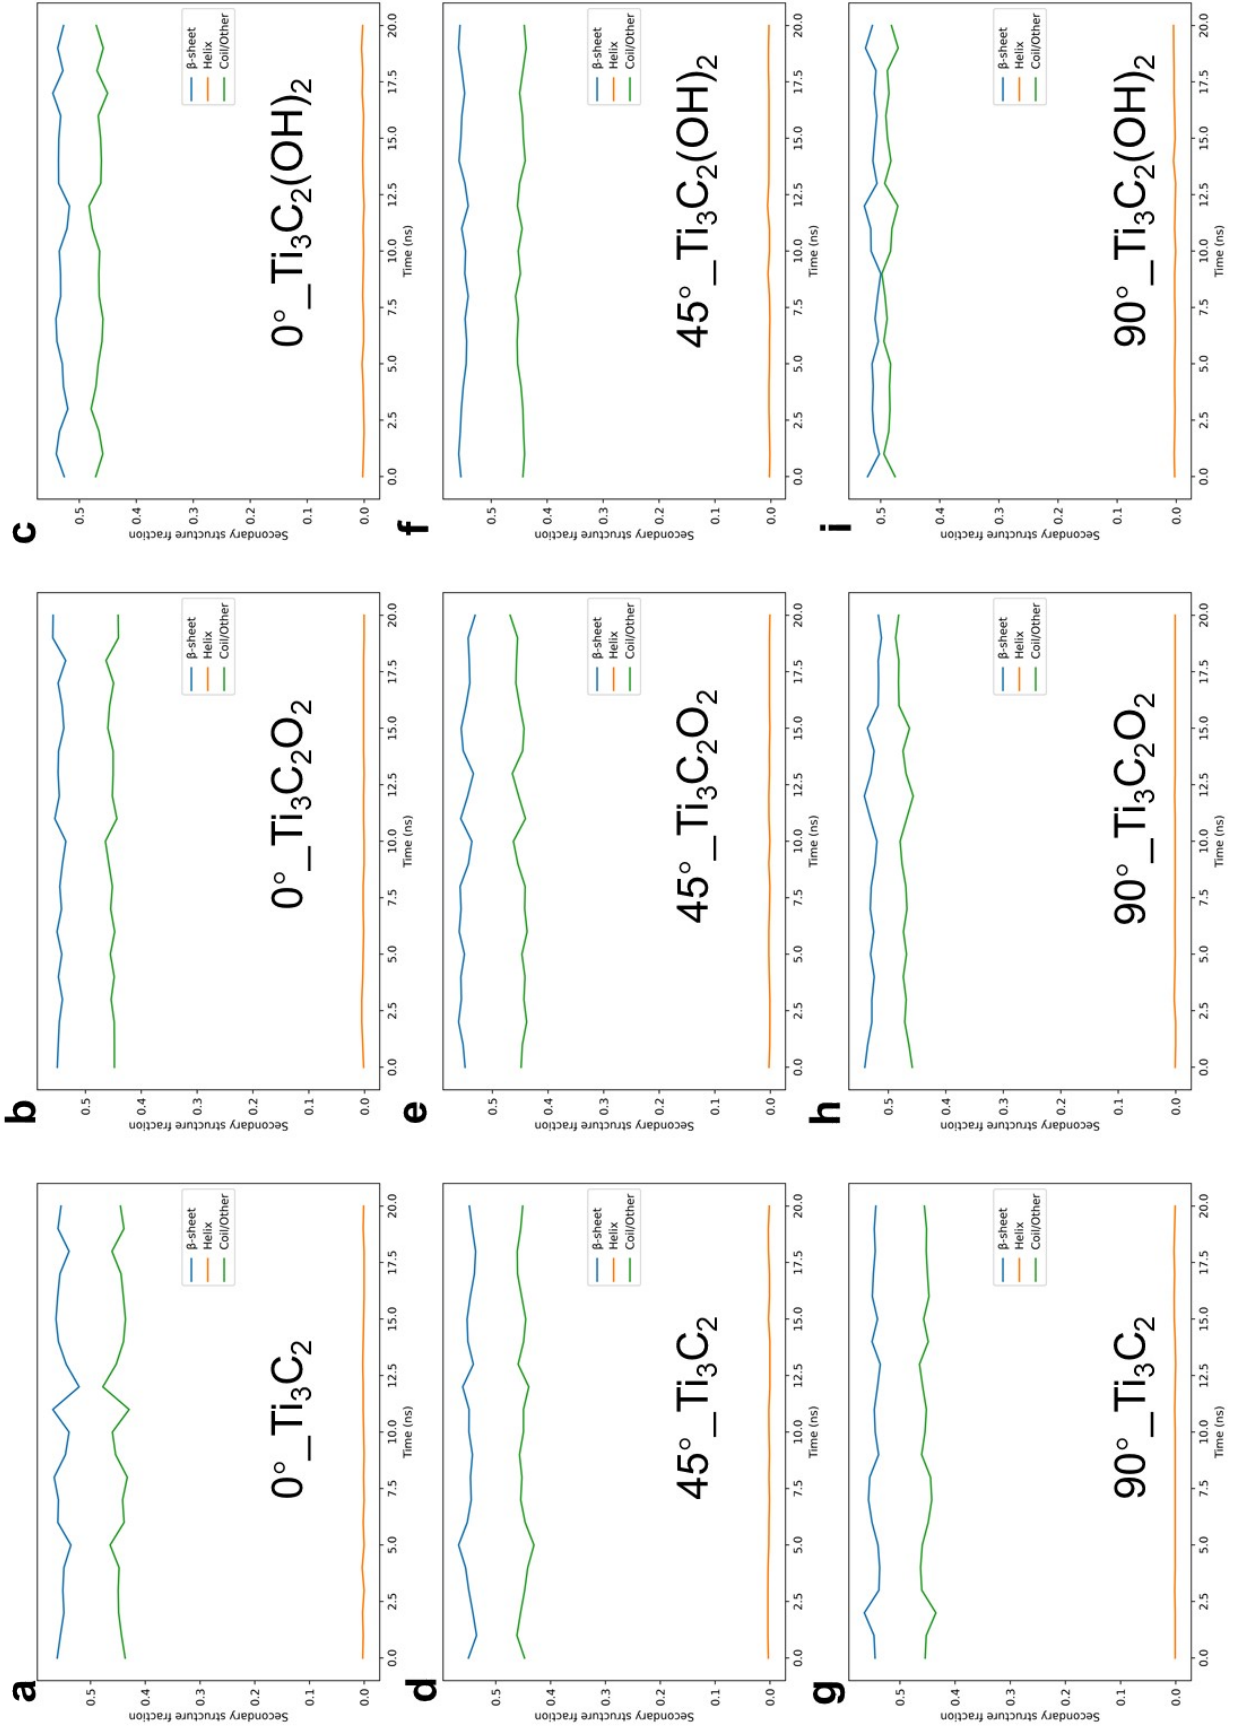

**Figure S4.** Synergistic Effects of MXene Surface Functionalization and Silk Fibroin Alignment Angle on the Mechanical Performance and its Interfacial Failure Modes.

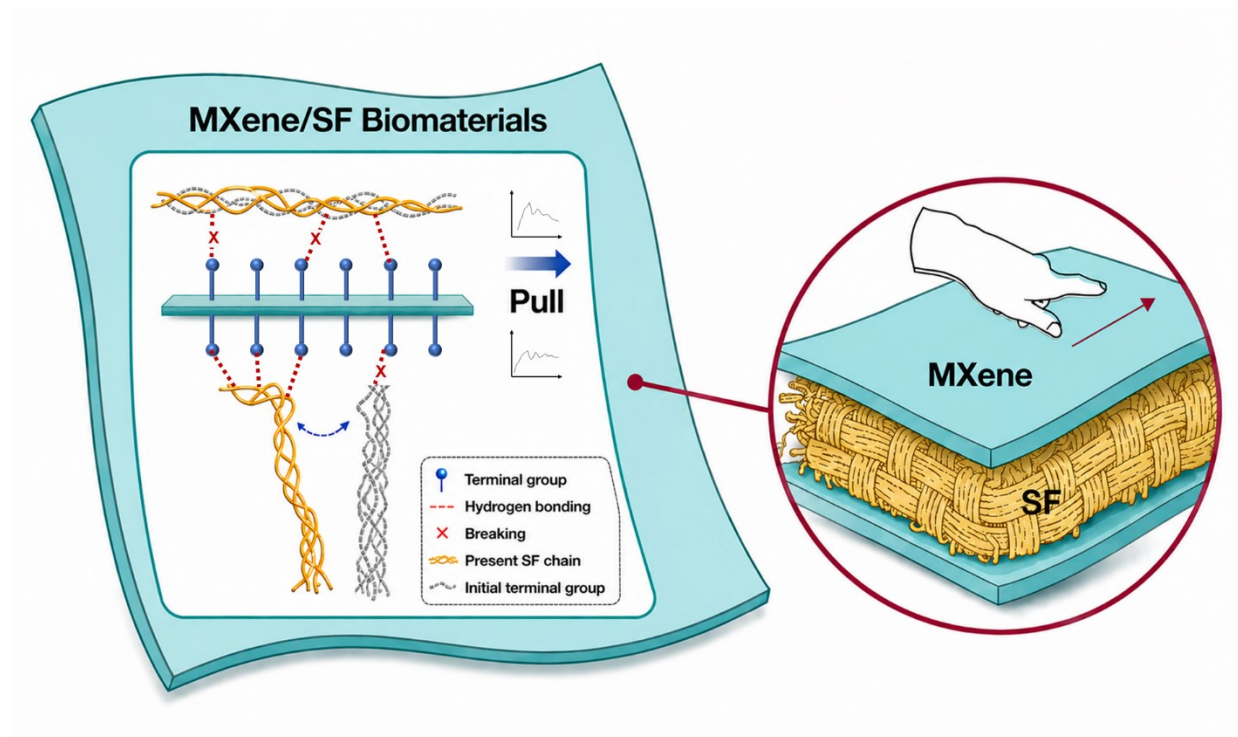

Supplement: d6cp00525j9.pdf [file d6cp00525j9.pdf]
