# Supplementary material
Source: Royal Society of Chemistry journal article supplement (doi:10.1039/d6cp00525j)
Supplement: d6cp00525j10.pdf [file d6cp00525j10.pdf]

| <b>Types</b>                                               | <b>Water molecules number</b> |
|------------------------------------------------------------|-------------------------------|
| 0°_Ti <sub>3</sub> C <sub>2</sub> /Silk                    | 68257                         |
| 0°_Ti <sub>3</sub> C <sub>2</sub> O <sub>2</sub> /Silk     | 67310                         |
| 0°_Ti <sub>3</sub> C <sub>2</sub> (OH) <sub>2</sub> /Silk  | 66496                         |
| 45°_Ti <sub>3</sub> C <sub>2</sub> /Silk                   | 82165                         |
| 45°_Ti <sub>3</sub> C <sub>2</sub> O <sub>2</sub> /Silk    | 80826                         |
| 45°_Ti <sub>3</sub> C <sub>2</sub> (OH) <sub>2</sub> /Silk | 81228                         |
| 90°_Ti <sub>3</sub> C <sub>2</sub> /Silk                   | 82221                         |
| 90°_Ti <sub>3</sub> C <sub>2</sub> O <sub>2</sub> /Silk    | 81965                         |
| 90°_Ti <sub>3</sub> C <sub>2</sub> (OH) <sub>2</sub> /Silk | 81550                         |
