# Supplementary material
Source: Royal Society of Chemistry journal article supplement (doi:10.1039/d6cp00525j)

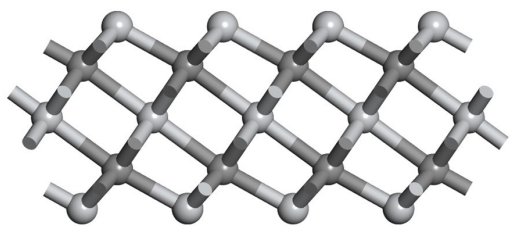

$\text{Ti}_3\text{C}_2$

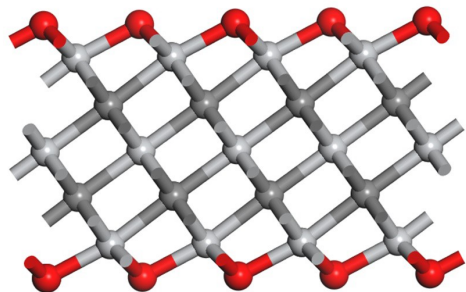

$\text{Ti}_3\text{C}_2\text{O}_2$

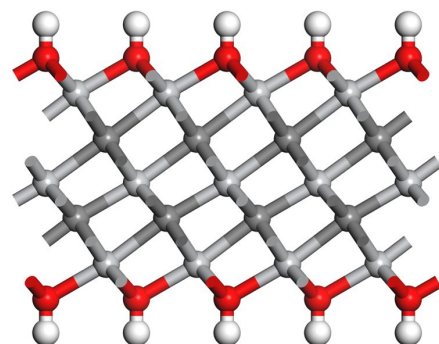

$\text{Ti}_3\text{C}_2(\text{OH})_2$

Supplement: d6cp00525j2.pdf [file d6cp00525j2.pdf]

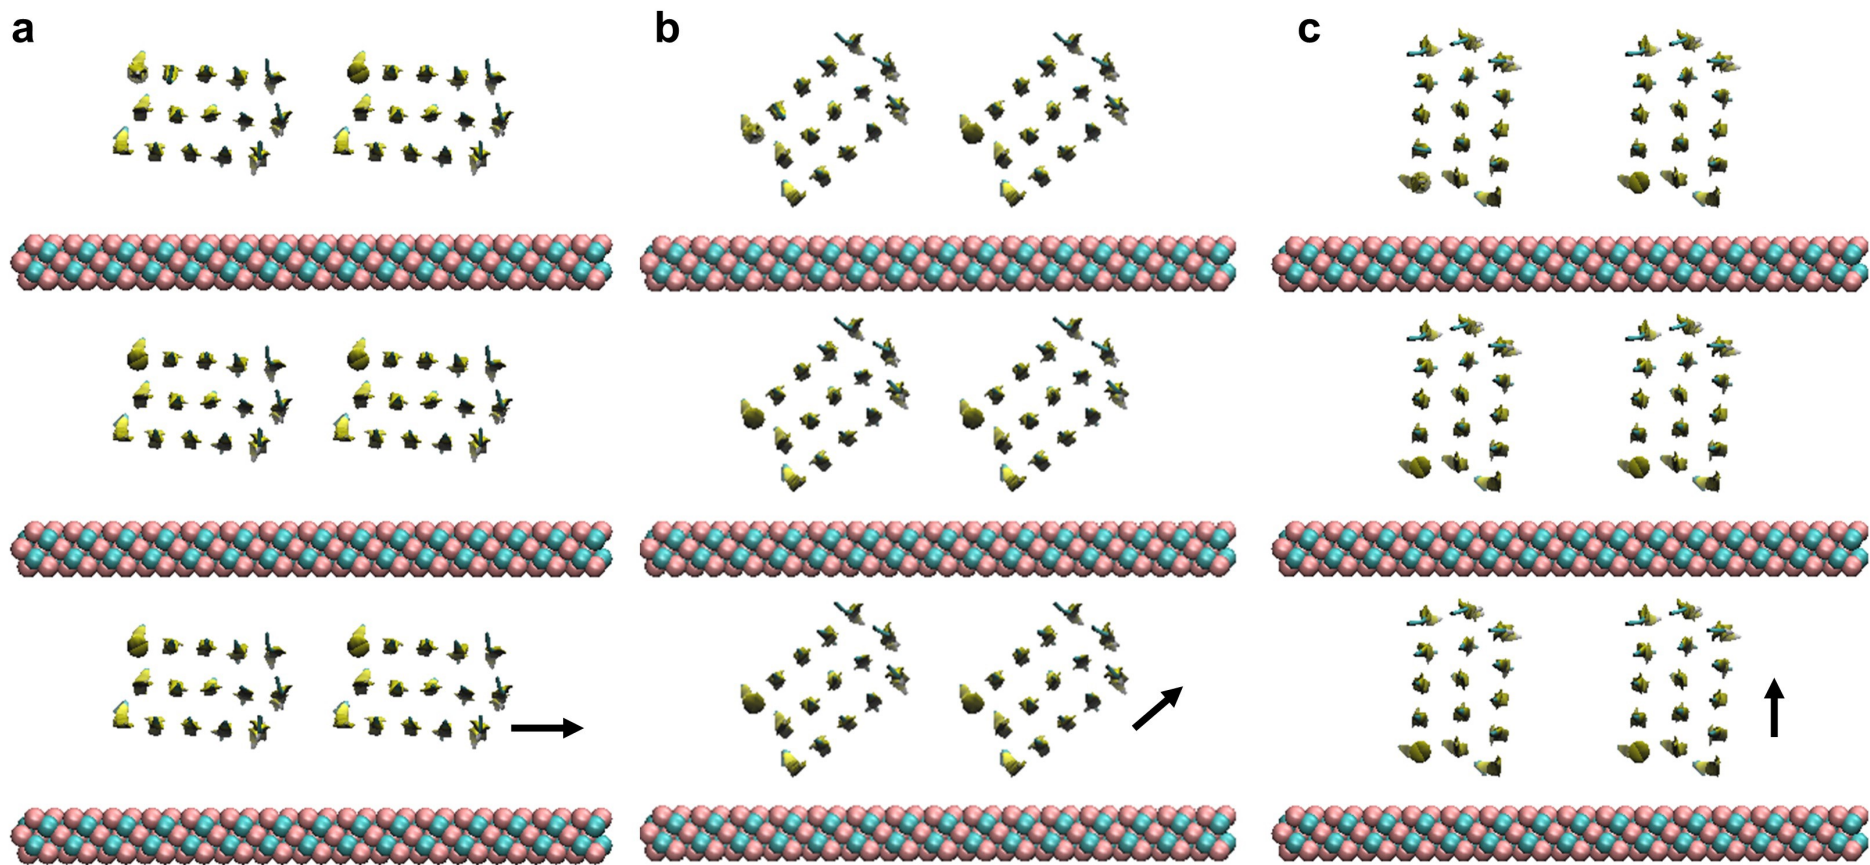

Supplement: d6cp00525j4.pdf [file d6cp00525j4.pdf]

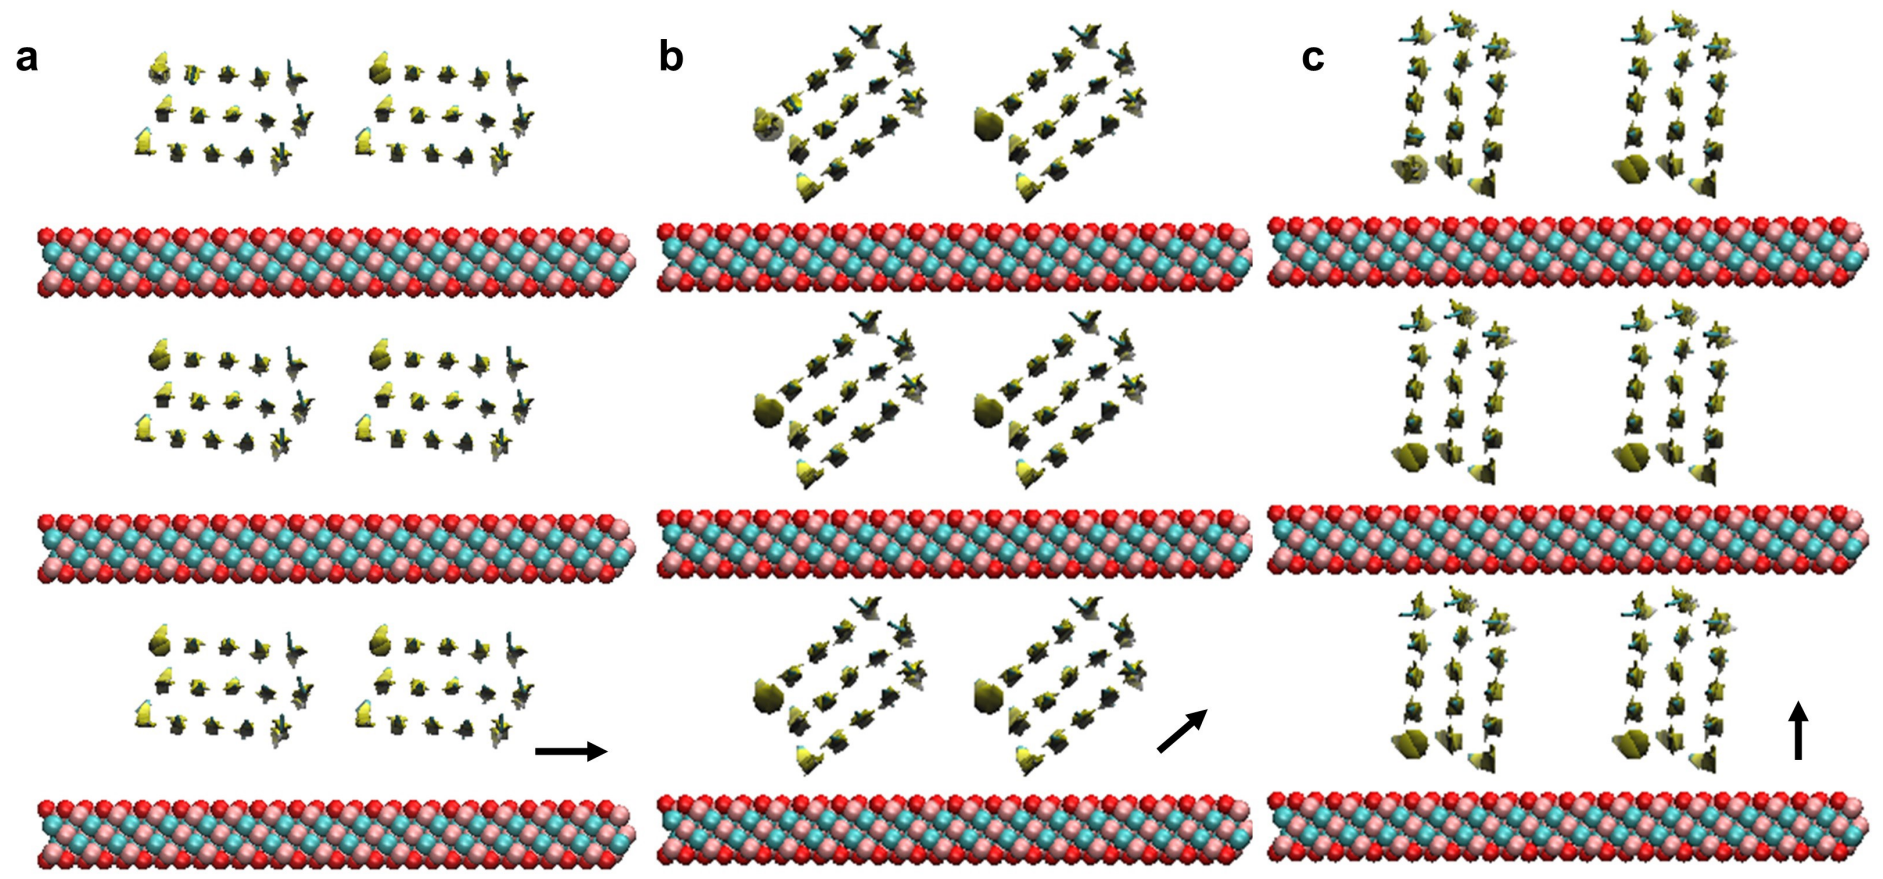

Supplement: d6cp00525j5.pdf [file d6cp00525j5.pdf]

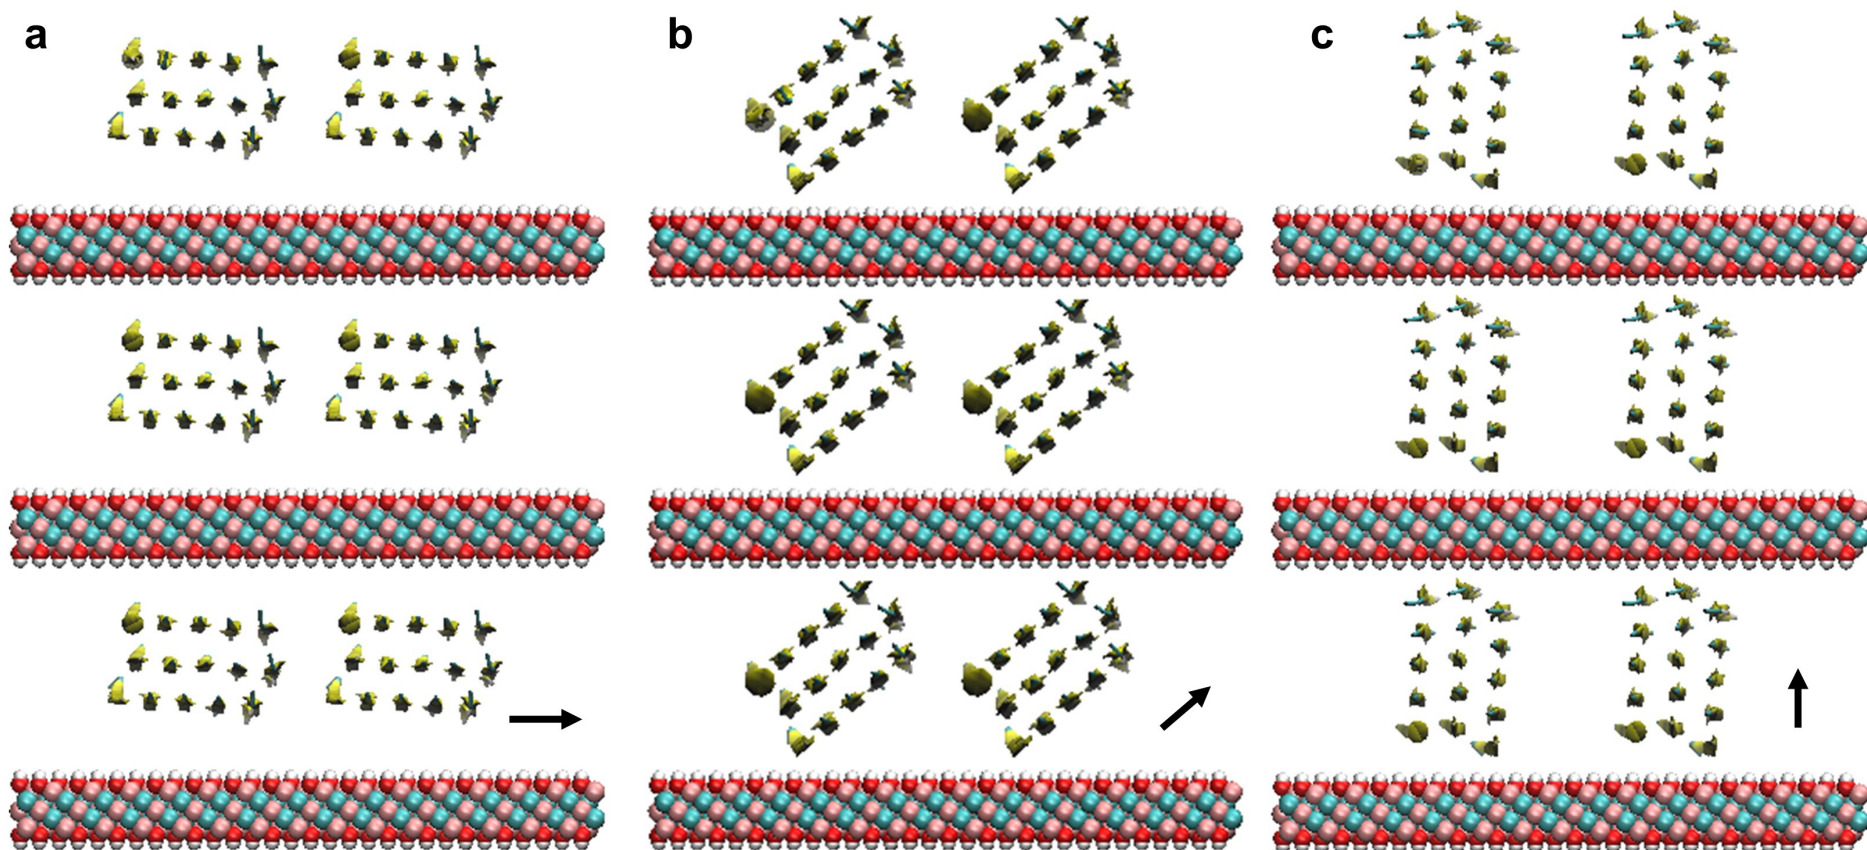

Supplement: d6cp00525j6.pdf [file d6cp00525j6.pdf]

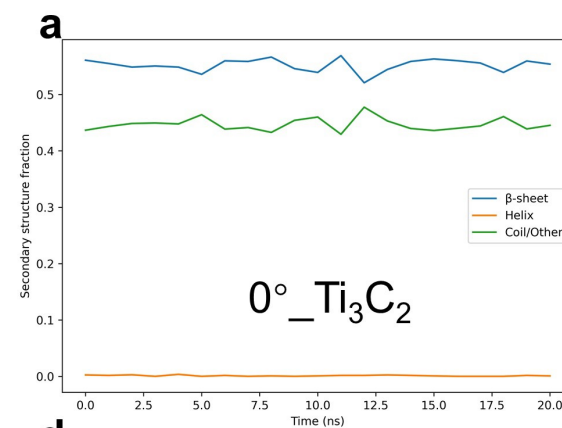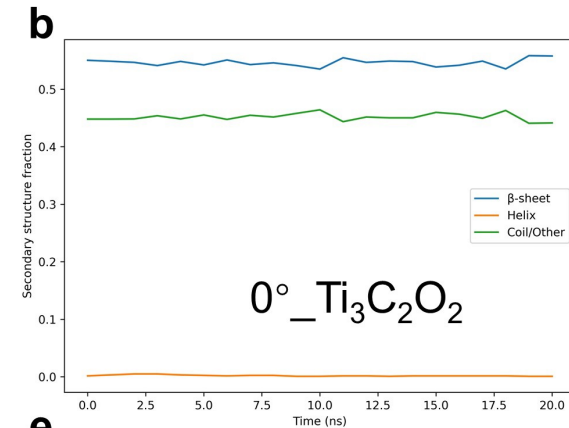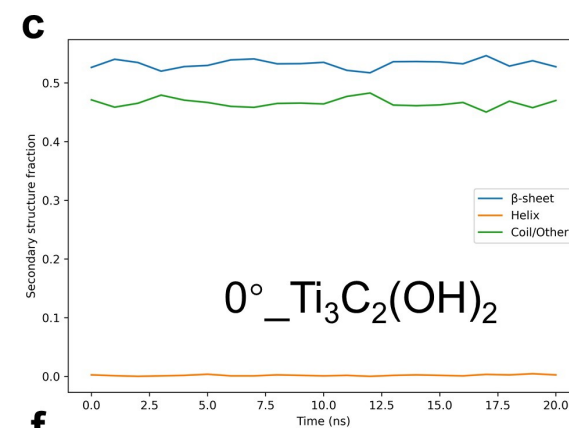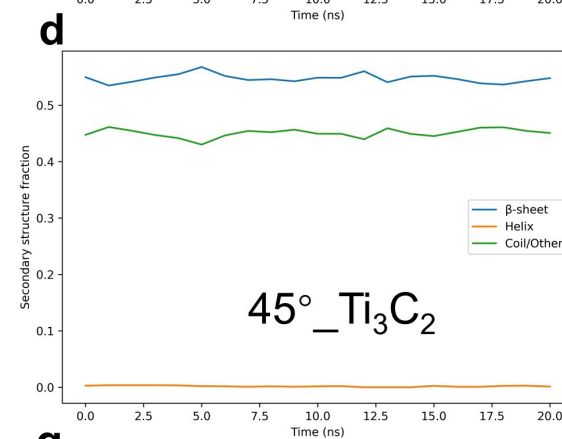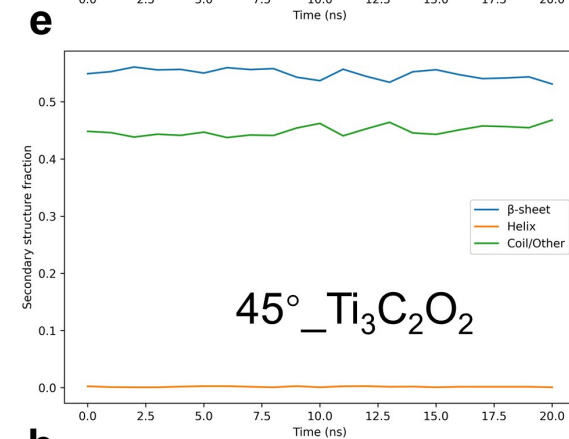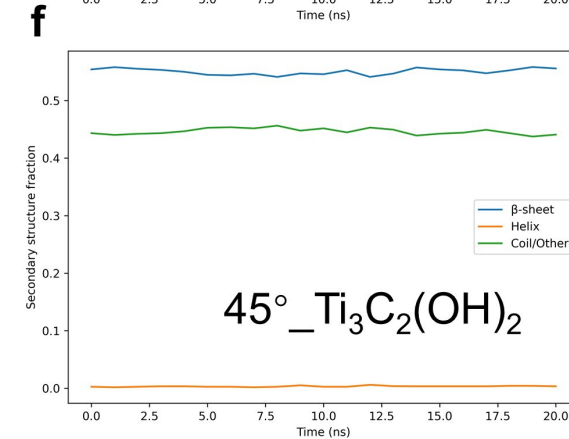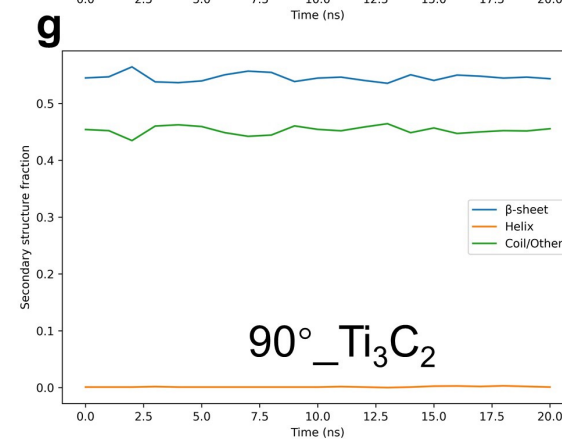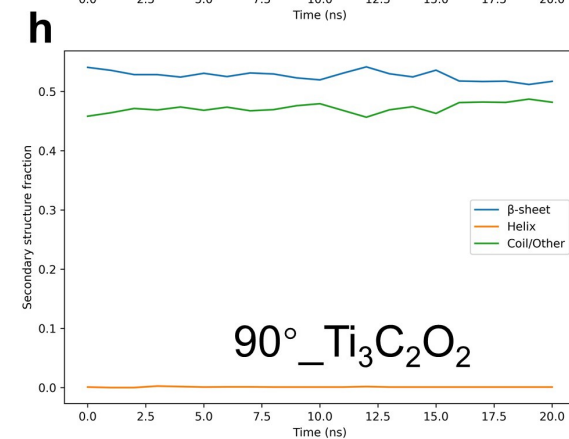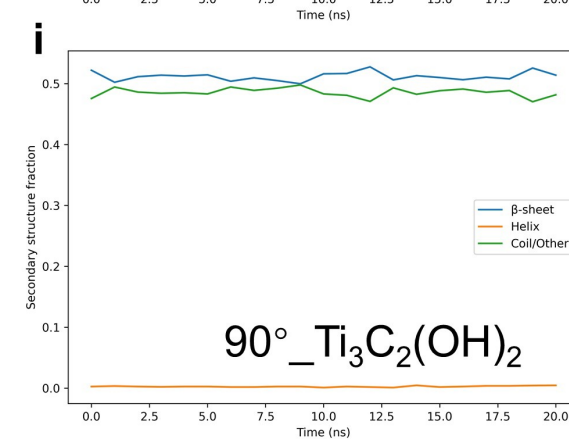

Supplement: d6cp00525j7.pdf [file d6cp00525j7.pdf]

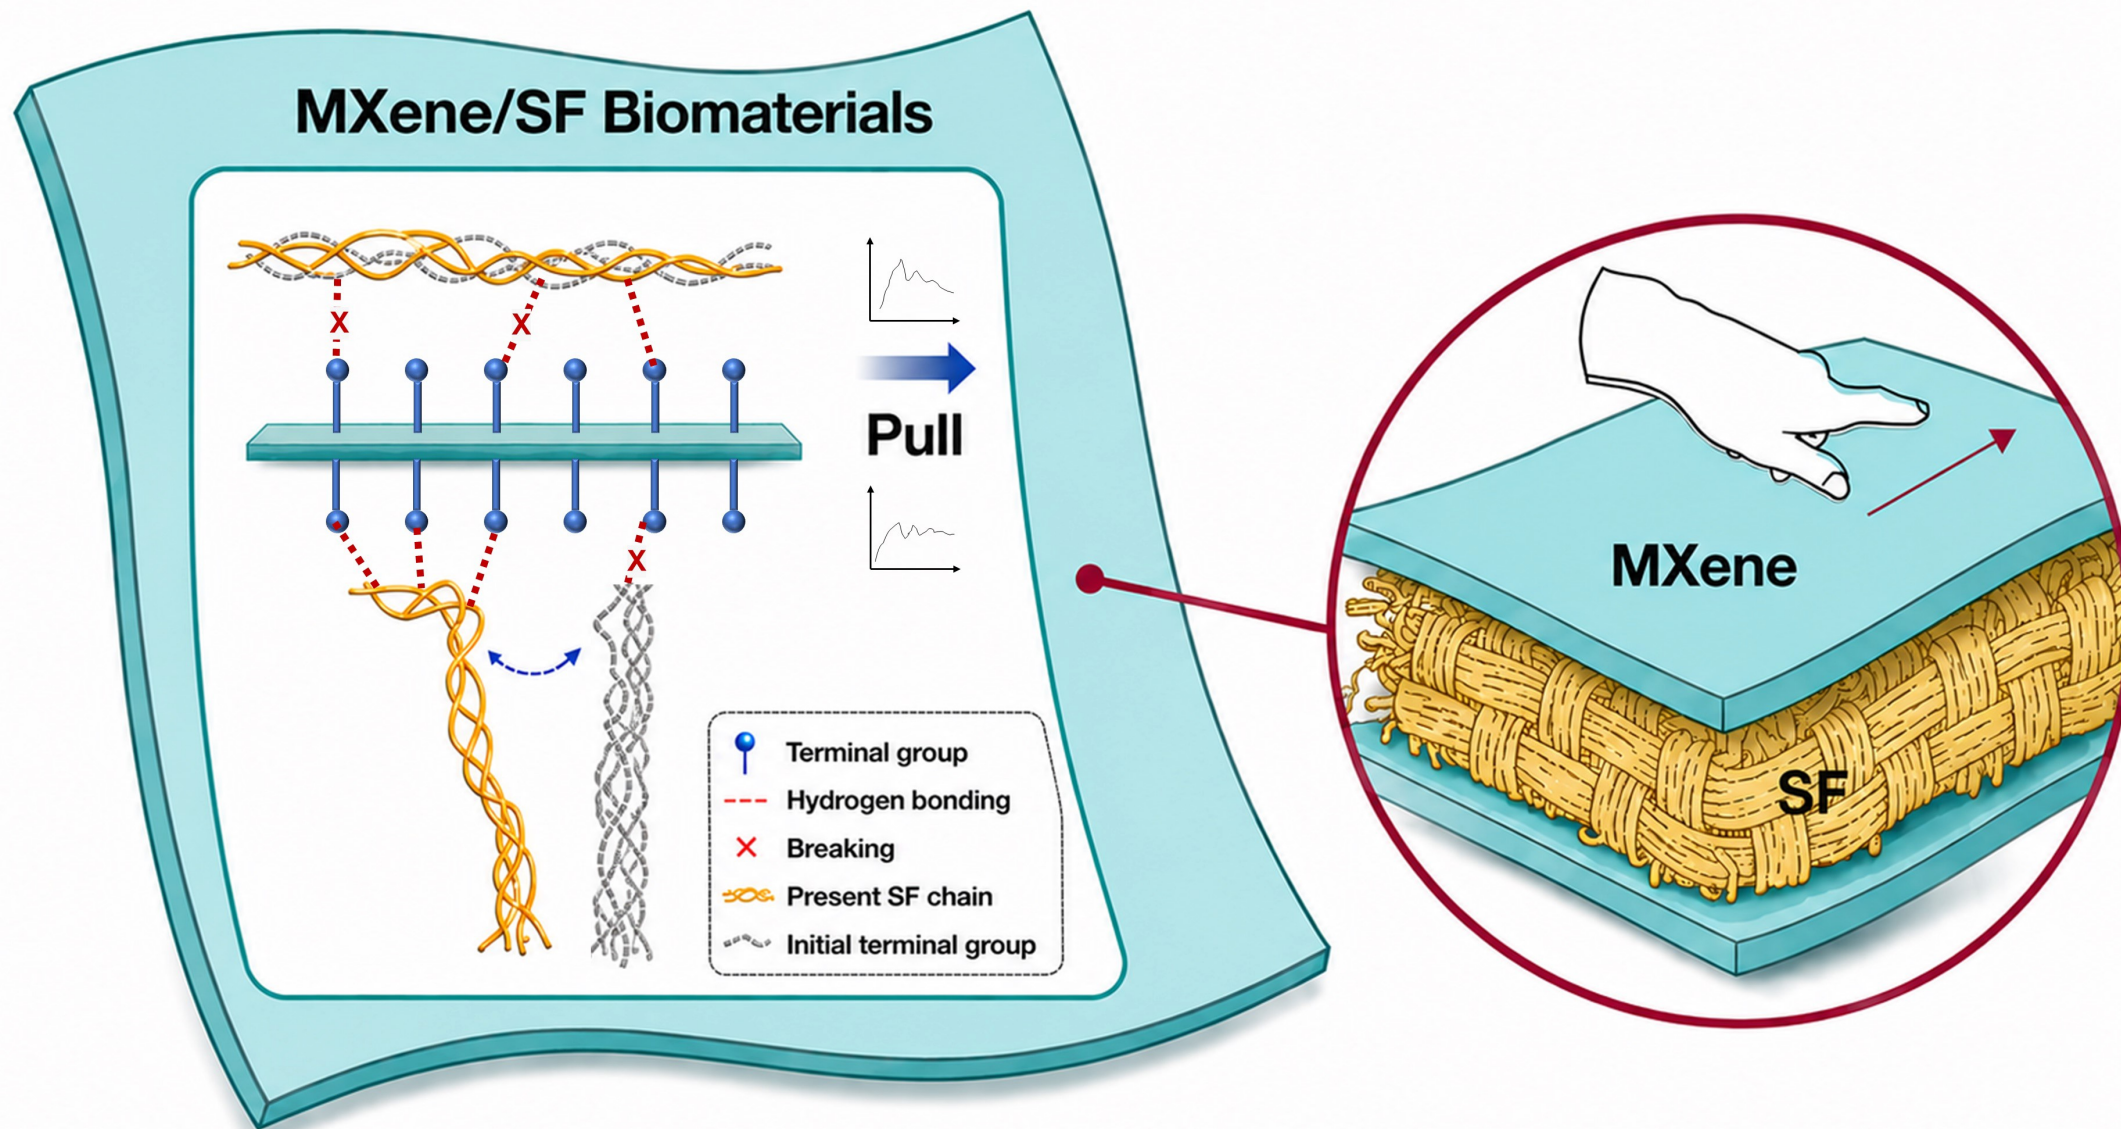

Supplement: d6cp00525j8.pdf [file d6cp00525j8.pdf]
